# Supplementary material for: Biomimetic nanoplatform with selectively positioned indocyanine green for accurate sentinel lymph node imaging
Source: Royal Society of Chemistry journal article supplement (doi:10.1039/d3nr03149g), 2023-01-01
Supplement: d3nr03149g1.pdf [file d3nr03149g1.pdf]

## **Biomimetic nanoplatform with selectively positioned indocyanine green for accurate sentinel lymph node imaging**

Wenjing Cheng<sup>2,#</sup>, Xiangbai Wu<sup>1,#</sup>, Shi Yu<sup>2</sup>, Chengwei Zhang<sup>2</sup>, Yinhong Song<sup>2</sup>,  
Xinzhi Li<sup>2</sup>, Xiang Yu<sup>3,4\*</sup>

<sup>1</sup>Hubei Provincial Clinical Research Center for Precise Prevention and Treatment of Elderly Gastrointestinal Cancer, The Second People's Hospital of China Three Gorges University, Yichang, China

<sup>2</sup>Hubei Key Laboratory of Tumor Microenvironment and Immunotherapy, China Three Gorges University, Yichang, China

<sup>3</sup>School of Biomedical Engineering, Hainan University, Haikou, Hainan, China

<sup>4</sup>Key Laboratory of Biomedical Engineering of Hainan Province, School of Biomedical Engineering, Hainan University

\*Corresponding author

\*Correspondence to: School of Biomedical Engineering, Hainan University, Haikou, Hainan 570228, China. E-mail addresses: [yuxiang@hainanu.edu.cn](mailto:yuxiang@hainanu.edu.cn); [yuxiangwl2008@sina.com](mailto:yuxiangwl2008@sina.com)

#These authors contributed equally to this work

## Supporting Information

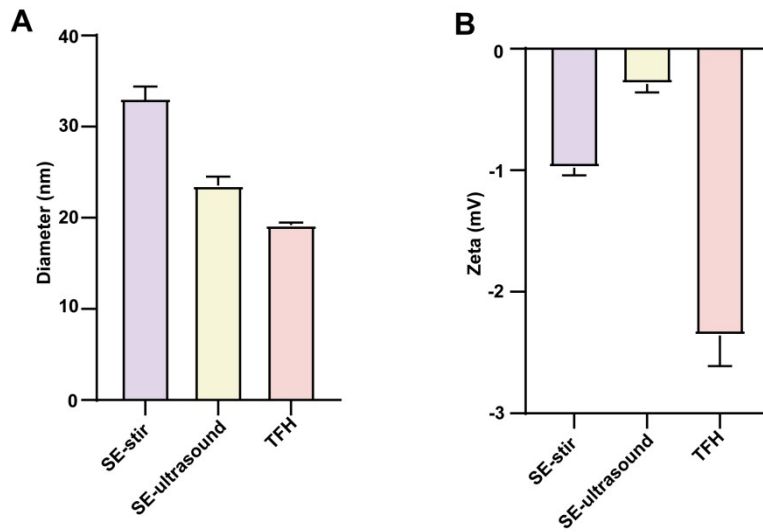

**Figure S1:** (A) Average size and (B) zeta potential of F127-ICG obtained by the SE and TFH methods. SE: solvent evaporation. TFH: thin film hydration.

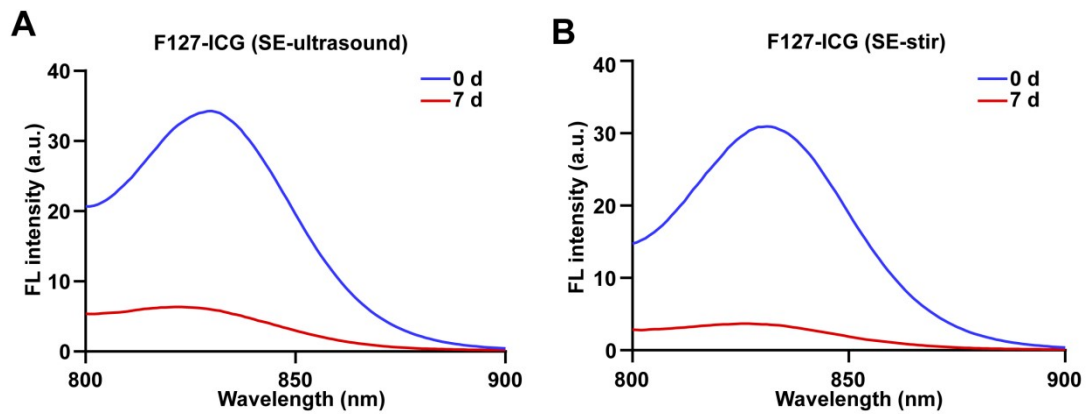

**Figure S2:** Fluorescence changes of F127-ICG obtained by SE-ultrasound or SE-stir methods at 0 d and 7 d. SE: solvent evaporation.

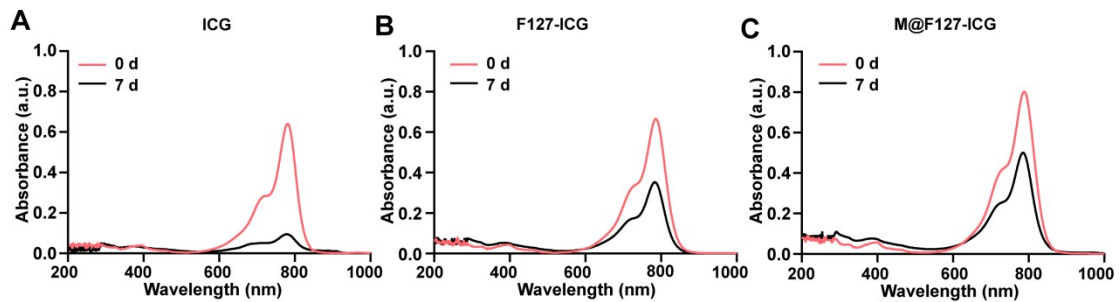

**Figure S3:** Stability detection of M@F127-ICG. The absorption spectrum of ICG (A), F127-ICG (B), and M@F127-ICG (C) was monitored at 0 d and 7 d.

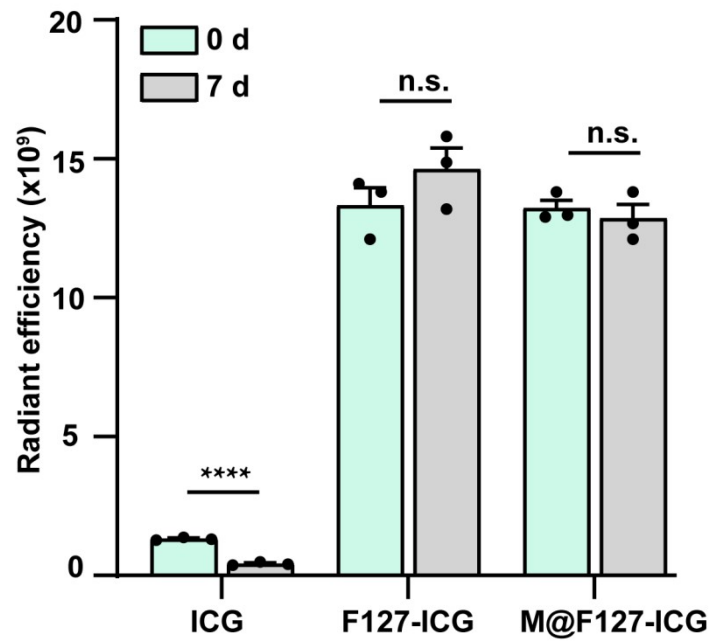

**Figure S4:** Quantitative analysis of the radiant efficiency in ICG, F127-ICG, and M@F127-ICG in vitro. ICG concentration: 10  $\mu\text{M}$ . Data are presented as the mean  $\pm$  SEM and were statistically analysed using unpaired T-tests. n.s. represents no significant difference. \*\*\*\* $p < 0.0001$ .

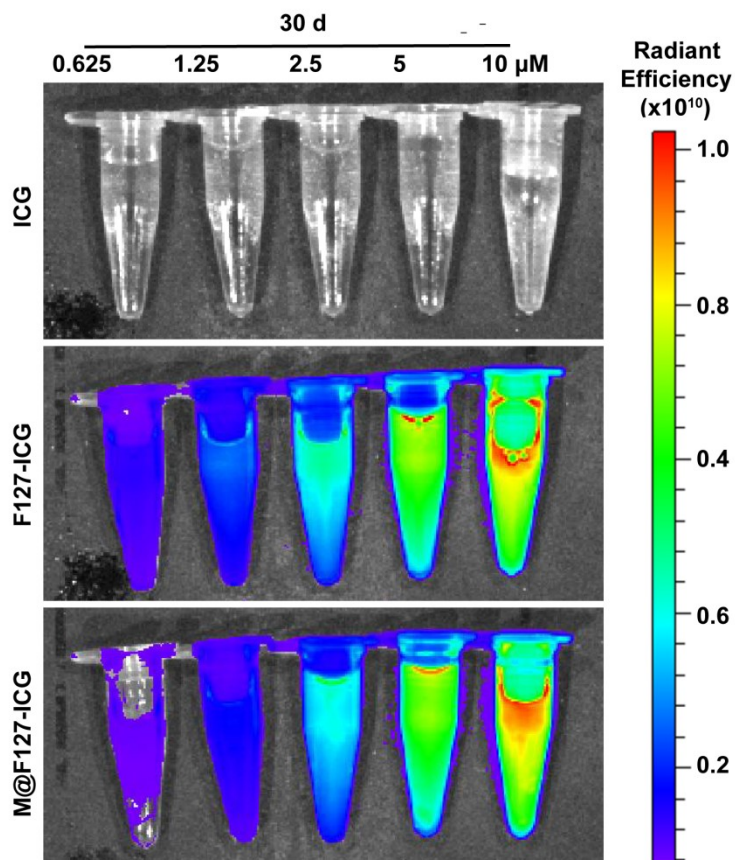

**Figure S5:** Fluorescence images of ICG, F127-ICG, and M@F127-ICG at 30 d.
